# Supplementary material for: The revised complete mitogenome sequence of the tree frogPolypedatesmegacephalus(Anura, Rhacophoridae) by next-generation sequencing and phylogenetic analysis
Source: PeerJ journal article supplement (doi:10.7717/peerj.7415), 2019-08-01
Supplement: Fig._S3.pdf [file Fig._S3.pdf]

*Bufo japonicus*

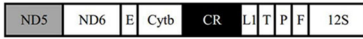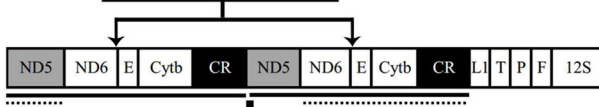

**Tandem duplication and multiple deletions**

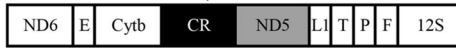

*Buergeria buergeri*

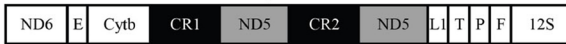

**Tandem duplication and single deletion**

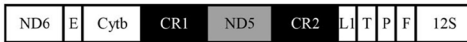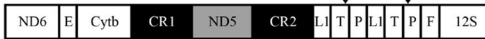

**Tandem duplication and multiple deletions**

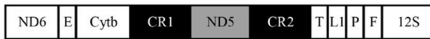

*Rhacophorus schlegelii*  
*Polypedates megacephalus*
