# Supplementary material for: The revised complete mitogenome sequence of the tree frogPolypedatesmegacephalus(Anura, Rhacophoridae) by next-generation sequencing and phylogenetic analysis
Source: PeerJ journal article supplement (doi:10.7717/peerj.7415), 2019-08-01

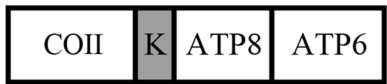

**Tandem duplication**

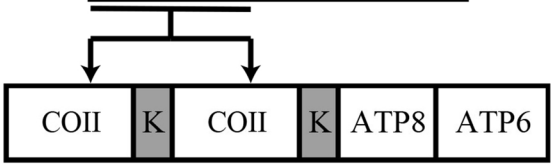

**Random mutation**

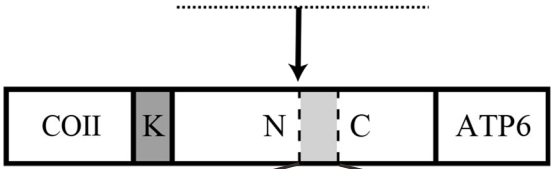

*P. megacephalus*

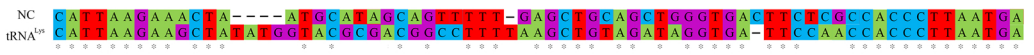

Supplement: Fig._S4.pdf [file Fig._S4.pdf]
