# Supplementary material for: The revised complete mitogenome sequence of the tree frogPolypedatesmegacephalus(Anura, Rhacophoridae) by next-generation sequencing and phylogenetic analysis
Source: PeerJ journal article supplement (doi:10.7717/peerj.7415), 2019-08-01
Supplement: Fig._S5.pdf [file Fig._S5.pdf]

**Repeat I**

CR\* TAAGCATTAATTTATTTACCCCATCATACTATGTATAATAAGCATTAATTTATTTACCCCATCATACTATGTATAATAAGCATTAATTTATTTACCCCAT  
CR1 .....  
CR2 .....

CATACTATGTATAATAAGCATTAATTTATTTACCCCATCATACTATGTATAATAAGCATTAATTTATTTACCCCATCATACTATGTATAATAAGCATTAATTTATTTAAAGTACAATATATAATTTTTTAAATGAACT  
..... CC.....T.....G.....  
..... CC.....T.....G.....

**TAS**

CR\* TCAAAGTTTAAACATAAAACTATTTAGACTTATAAATGAATGATTTAGAACTAAAATAAAAGAATACATTATTTTATTCAATACATGCTTATTATTTCCATTAAGGGCGGATTCTTAATGAACAACTGATTAATACCAC  
CR1 ...G.AA.....ACA.....TC..T..CT..G.....A.....T..C.....C..A.....A.....  
CR2 ...G.AA.....ACA.....TC..T..CT..G.....A.....T..C.....C..A.....A.....

TAAACTGAATAAATGATTAATAAATGATTGCCAGAGCCTTAACTATGTCTACTTTATCGGACCTTCACTTGCTTAAGTATATGCGTATCATATCCAAATTTTAAATCCACCTCTTTATTCCCATCCCACAAGAATAAATT  
.....CCC.....C.....A.....C.A.G.....C.....  
.....CCC.....C.....A.....C.A.G.....C.....

CR\* AAAATGTATGAATAACAAATAATTATTACTACTTTACACCTTCAAGCATAACACACCTGTTTTAACACAATACTGAATGTATCATTCAATTTAAACAAGGTAAGACCTTCACTTGCATTAGATCATGAATATTCCAGTC  
CR1 .....T...GG.CT...T..T.....C.....C.....T.....AT.....G.....  
CR2 ...G.....T...GG.CT...T..T.....C.....C.....T.....AT...A.....G.....

AATTTAATATGATAATTAACTATAATGGAATATTATTGACAACAATAACTAATTGCGTTTTAAGAAAAGAGGGCTCTTTTTCTTCAGAATAATTATTCATCTCCTATTATAATAATCCATGAATATTATCTACCAATT  
.....A.....C.A.T.....C.....A.....T.....  
.....A.....C.A.T.....C.....A.....T.....

CR\* GTCTGCATATTCGGACATAACGTCCATCCACTAAACCTAAATTAGCATGCCCTCAACCCAGTAATTATATCATGGACCTCTCGCAGTGCCTCTACCGGGATCAATTAATAAGCCGACCCCTTTCTCTCTTTTCATGA  
CR1 A.....A.....C.....A.T.....T..A.....G...A.....  
CR2 A.....A.....C.....A.T.....T..A.....G...A.....

GACTTCTGACGGAACCGAATCTATGGACCCACAGATAAGTATAACCTACTGAAGCTGTTTTAAAGGCTTTGGTGGGCTGGTGGAGATAAGGACCTTTAATATAAGCTCAGACCACTTAATGAAGTCAAGGTCGGCCAG  
.G.....T.....TTA...A.C..C.....A.CA...A.....G.....G.....  
.G.....T.....TTA...A.C..C.....A.CA...A.....G.....G.....

**Oh**

CR\* ACTATTTTGGGTTTTTGGCATTTCATCAGCAAGGTCAGGGTGGTTTTCACTCTGAGCGTCATCGCCAATATTATACTACAAGGCACCCACTCAGCAGTGTTCACCTACCCTTCCCATGGACAACAAAAGCAGGCATTTT  
CR1 .....TC.....A  
CR2 .....TC.....A

AATTAAGGTGGGGCAAAAAGCTATAATTGATGTCCCGCTAATCTATGGTATCCCCAGGACATCTCTGCATGCTTGTAAAGACATAATTTTAAACGATCTAGCGAAATCCCCTATACCCTTATTTCCCCCCCCTTTGCACT  
...G...A...G...C...C...G...AC.....  
...G...A...G...C...C...G...AC.....

**CSB 1**

**CSB 2**

**CSB 3**

CR\* TTTTTTAAACTTTTTTCATTAAAATTTTACAAAATTTAAAATTTTTTCGCGCTACCCCCCCTTACCCCCCCCATGGATTATTCTACCAGCAACTCCTAATACCCCCCCCGGGATTAAGAAGTGTAGATTTTCTGGA  
CR1 .....C.....C.....G.....C.....  
CR2 .....C.....C.....G.....C.....

**Repeat II**

AGGTCCACAGAGCAATGCTGCTTCTGAGTGTATACCTGAATT- - - CCCCATAAATATATCATTATGCAATTTTCCAGTAGATATGTAAATTAATCTTATGAAATTGATCAATTTATATTGATGAATTTAACTAATCTCC  
.....A.....TTCC..ATCAC-TA-----  
.....A.....TTTT...CCC.TAT...T.....A.....G.C.C.....A.....G.....C.....

CR\* GTGATTTCCCTGCGTAAATATATCATTATGCAATTTTCCAGTAGATATGTAAATTAATCTTATGAAATTGATCAATTTATATTGATGAATTTAACTAATCTCCGTGATTTCCCTGCGTAAATATATCATTATGCAATTTTCCAG  
CR1 -----  
CR2 T.....T.....C.C.....A.....G.....C.....T.....T.....

TAGATATGTAAATTAATCTTATGAAATTGATCAATTTATATTGATGAATTTAACTAATCTCCGTGATTTCCCTGCGTAAATATATCATTATGCAATTTTCCAGTAGATATGTAAATTAATCTTATGAAATTGATCAATTTA  
-----  
.....C.C...C.....A.....G.....C.....T.....T.....A.....G.C.C.....A.....

CR\* TATTGATGAATTTAACTAATCTCCGTGATTTCCCTGCGTAAATATATCATTATGCAATTTTCCAGTAGATATGTAAATTAATCTTATGAAATTGATCAATTTATATTGATGAATTTAACTAATCTCCGTGATTTCCCTGCGT  
CR1 -----  
CR2 .....G.....C.....T.....T.....C.C.....A.....G.....C.....T.....

AAATATATCATTATGCAATTTTCCAGTAGACATGTAAATTAATCTTATGAAATTGATCAATTTAT  
-----  
.....T.....A...T...G.C.C.....A.....
